# Supplementary material for: Facile aminoacylation of pdCpA dinucleotide with a nonnatural amino acid in cationic micelleElectronic Supplementary Information (ESI) available: experimental procedure and spectral data for Pen-napAla-OCM and pdCpA-(Pen-napAla). See http://www.rsc.org/suppdata/cc/b3/b306011j/
Source: Royal Society of Chemistry journal article supplement (doi:10.1039/b306011j), 2003-01-01
Supplement: b306011j.doc [file b306011j.doc]

# Electronic Supplementary Information

Facile aminoacylation of pdCpA dinucleotide with a nonnatural amino acid in cationic micelle

Keiko Ninomiya, Tomoyoshi Kurita, Takahiro Hohsaka and Masahiko Sisido*

Department of Bioscience and Biotechnology, Faculty of Engineering, Okayama University, 3-1-1 Tsushimanaka, Okayama 700-8530, Japan. Fax:+81-86-251-8219; Tel: +81-86-251-8218;

E-mail: sisido@cc.okayama-u.ac.jp

Experimental procedures

**Measurements**

MALDI-TOF mass spectra were taken on a Voyager DE Pro instrument. Sinnapinic acid was used as a matrix at concentration of 10 mg/mL in 0.1% trifluoroacetic acid/acetnitrile (1:1, v/v). Aminoacylation was monitored by analytical reverse phase HPLC (Waters, μBondasphere, C18 5μm, 100Å, 3.9x150), flow rate 0.6 mL/min with gradient 0-100% acenitrile in 0.1% trifluoroacetic acid over 50 min.

**Synthesis of *N-(4-Pentenoyl)-L-2-naphthylalanine (Pen-napAla-OH)***

L-2-Naphthylalanine (napAla, Watanabe Chemical, Hiroshima, Japan) (482.8 mg, 2.2 mmol) in 80 mL of dioxane-water (1:1) was poured into 40 mL of water containing 554 mg of NaHCO3 (6.6 mmol). To this mixture, 0.6 mL of 4-pentenoic anhydride (Acros Organics, Belgium) (3.3 mmol) was added dropwise under ice temperature. The reaction mixture was stirred vigorously at rt for 16 h and was evaporated to remove dioxane under reduced pressure. The aqueous solution remained was acidified with 1N aq NaHSO4 and extracted with three 40-mL portions of ethyl acetate. The combined organic phase was washed with saturated aq NaCl, dried with MgSO4, filtered and evaporated under reduced pressure. Recrystallization with ethyl acetate-hexane (1:3) afforded *N-(4-pentenoyl)-L-2-naphthylalanine (Pen-napAla-OH)* as a white crystal (585 mg, 87.9%); Rf 0.63 (CHCl3-MeOH-water 65:35:6); mp 101-103 ˚C; 1H NMR (300 MHz, CDCl3) 2.27 (complex, 4H), 3.33 (ddd, 2H, J=5.50, 6.32 and 14.01), 4.93 (complex, 3H), 5.68 (m, 1H), 6.10 (d,1H, J=7.23), 7.54 (complex, 7H).

**Synthesis of *N-(4-Pentenoyl)-L-2-naphthylalanine cyanomethyl ester (Pen-napAla-OCM)***

To a solution containing 50 mg (0.17 mmol) of N-(4-pentenoyl)-L-2-naphthylalanine (Pen-napAla-OH) and 0.3 mL (2.2 mmol) of triethylamine in 0.6 mL of acetnitrile was added 0.1 mL (1.6 mmol) of chloroacetnitrile. The mixture was stirred at rt for 17 h and poured into ethyl acetate. The latter solution was washed with 5% aq NaHSO4, 4% NaHCO3 and saturated aq NaCl. The organic phase was dried with MgSO4, filtered and concentrated under reduced pressure. Recrystallization with ethyl acetate-hexane (1:3) afforded *N-(4-pentenoyl)-L-2-naphthylalanine cyanomethyl ester (Pen-napAla-OCM)* as a white crystal　(30 mg, 60.0%); Rf 0.80 (CHCl3-MeOH-water 65:35:6); mp 139-140˚C; 1H NMR (300 MHz, CDCl3) 2.31 (complex, 4H), 3.32 (m, 2H), 4.75 (dd, 2H, J=15.68 and 40.15 Hz), 4.99 (complex, 3H), 5.73 (m, 1H), 5.86 (d, 1H, J=7.27 Hz), 7.57 (complex, 7H).
